# Supplementary material for: Influence of Different Types, Utilization Times, and Volumes of Aging Barrels on the Metabolite Profile of Red Wine Revealed by 1H-NMR Metabolomics Approach
Source: MDPI journal article supplement (doi:10.3390/molecules28186716), 2023-09-20
Supplement: s1 [file s1]

## Supplementary Materials

*Article*

# Influence of Different Types, Utilization Times, and Volumes of Aging Barrels on the Metabolite Profile of Red Wine Revealed by <sup>1</sup>H-NMR Metabolomics Approach

Suwanan Denchai <sup>1,2</sup>, Suppached Sasomsin <sup>3</sup>, Cheunjit Prakitchaiwattana <sup>2</sup>, Thanitaporn Phuenpong <sup>2</sup>, Kunaporn Homyog <sup>4</sup>, Wanwimon Mekboonsonglarp <sup>5</sup> and Sarn Settachaimongkon <sup>2,6,7,\*</sup>

<sup>1</sup> Program in Biotechnology, Faculty of Science, Chulalongkorn University, Bangkok 10330, Thailand; 6370195223@student.chula.ac.th

<sup>2</sup> Department of Food Technology, Faculty of Science, Chulalongkorn University, Bangkok 10330, Thailand

<sup>3</sup> Innovation & Winemaking Division, Siam Winery Company Limited, Samut Sakhon 74000, Thailand; suppached.s@siamwinery.com

<sup>4</sup> Center of Veterinary Diagnosis, Faculty of Veterinary Science, Mahidol University, Nakhon Pathom 73170, Thailand

<sup>5</sup> Scientific and Technological Research Equipment Center (STREC), Chulalongkorn University, Bangkok 10330, Thailand

<sup>6</sup> Emerging Processes for Food Functionality Design Research Unit, Chulalongkorn University, Bangkok 10330, Thailand

<sup>7</sup> Omics Sciences and Bioinformatics Center, Faculty of Science, Chulalongkorn University, Bangkok 10330, Thailand

\* Correspondence: sarn.s@chula.ac.th

**A**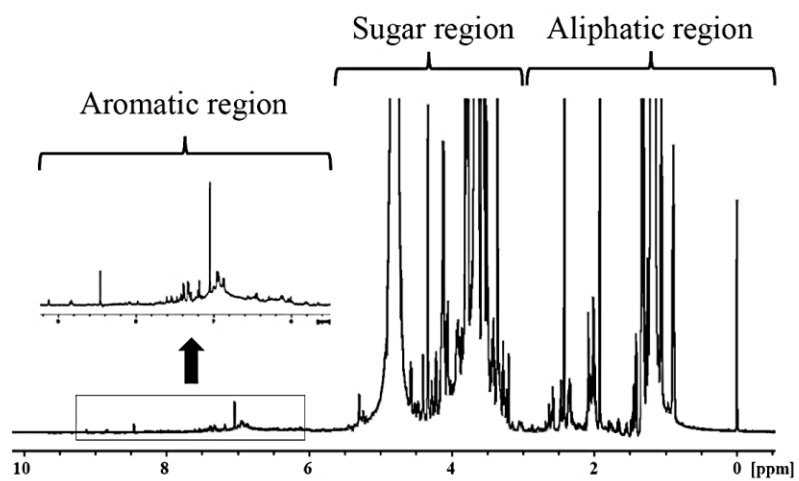**B**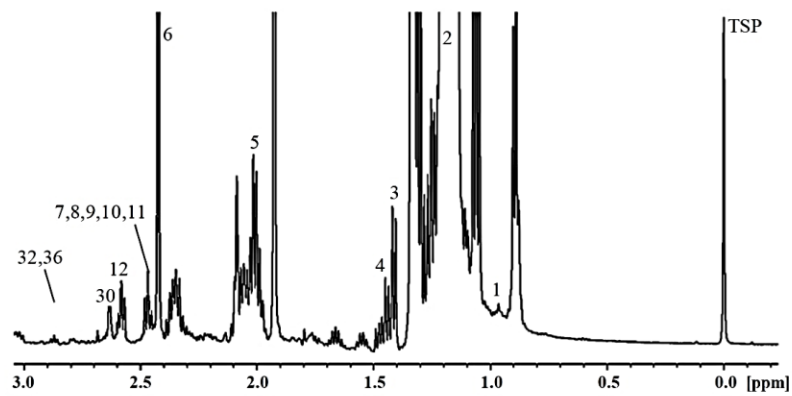**C**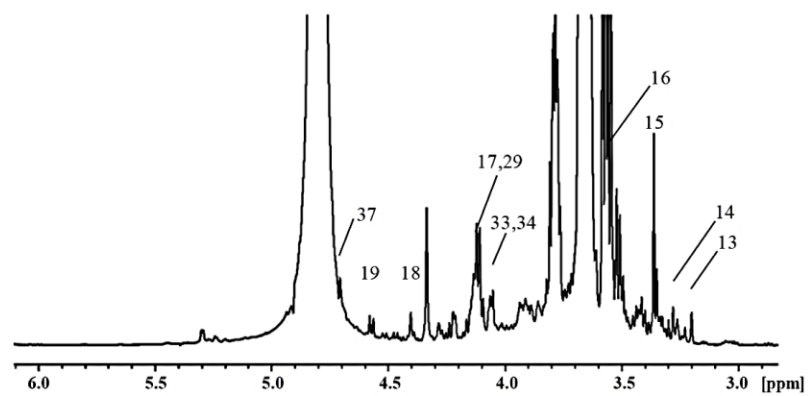**D**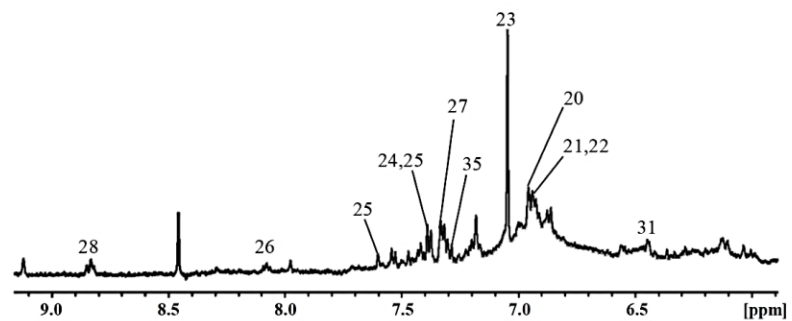

**Figure S1.** Representative NOESY-1D-<sup>1</sup>H-NMR spectra of a Shiraz wine sample (panel A) and expansions corresponding for aliphatic region (panel B), sugar region (panel C) and aromatic region (panel D) with assigned peaks: TSP : internal standard, 1: leucine, 2: ethanol, 3: lactate, 4: alanine, 5: proline, 6: acetate, 7: methionine, 8: acetoin, 9: acetoacetate, 10: pyruvate, 11: glutamate, 12: succinate, 13: choline, 14: myo-inositol, 15: methanol, 16: glycerol, 17: fructose, 18: tartrate, 19: glucose, 20: epicatechin, 21: *p*-hydroxyphenyl acetate, 22: tyrosine, 23: gallate, 24: phenylalanine, 25: chlorogenate, 26: formate, 27: histidine, 28: trigonelline, 29: arginine, 30: citrate, 31: fumarate, 32:  $\gamma$ -aminobutyrate, 33: malate, 34: mannitol, 35: syringate, 36: threonine and 37: valine.

**Table S1.** Assignment table of the non-volatile polar metabolites present in the <sup>1</sup>H-NMR spectra of Thai Shiraz wine sample

| Chemical Group     | Metabolite                           | Chemical Shift (ppm) <sup>a</sup>                                                                     |
|--------------------|--------------------------------------|-------------------------------------------------------------------------------------------------------|
| Alcohols           | (2) Ethanol                          | 1.17 (t) <sup>b</sup> 3.65 (q)                                                                        |
|                    | (16) Glycerol                        | 3.55 (m) 3.64 (m) 3.65 (m)                                                                            |
|                    | (34) Mannitol                        | 3.66 (m) 3.76 (m) 3.78 (d) 3.83 (m)                                                                   |
|                    | (15) Methanol                        | 3.35 (s)                                                                                              |
|                    | (14) Myo-Inositol                    | 3.26 (t) 3.52 (m) 3.61 (t) 4.05 (t)                                                                   |
| Amino acids        | (4) Alanine                          | 1.47 (d) 3.77 (q)                                                                                     |
|                    | (29) Arginine                        | 3.25 (t) 3.77 (t)                                                                                     |
|                    | (11) Glutamate                       | 2.13 (m) 2.32 (t) 2.37 (t) 3.76 (m)                                                                   |
|                    | (27) Histidine                       | 3.24 (m) 3.31 (m) 4.00 (m) 7.27 (s)                                                                   |
|                    | (1) Leucine                          | 0.95 (m) 3.74 (m)                                                                                     |
|                    | (7) Methionine                       | 2.12 (s) 2.63 (t) 3.87 (t)                                                                            |
|                    | (24) Phenylalanine                   | 3.15 (m) 3.28 (m) 4.00 (m) 7.31 (d) 7.36 (m) 7.40 (m) 7.41 (m)                                        |
|                    | (5) Proline                          | 1.99 (m) 2.03 (m) 2.06 (m) 2.34 (m) 3.33 (m) 3.41 (m)                                                 |
|                    | (36) Threonine                       | 1.32 (d) 3.60 (d) 4.26 (m)                                                                            |
|                    | (22) Tyrosine                        | 3.04 (m) 3.19 (m) 3.94 (m) 6.89 (d) 7.18 (d)                                                          |
| Organic acids      | (37) Valine                          | 0.96 (d) 1.04 (d) 2.27 (m) 3.60 (d)                                                                   |
|                    | (6) Acetate                          | 1.91(s)                                                                                               |
|                    | (9) Acetoacetate                     | 2.27 (s) 3.44 (s)                                                                                     |
|                    | (8) Acetoin                          | 2.21 (s) 4.43 (m)                                                                                     |
|                    | (13) Choline                         | 3.19 (s) 4.05 (m)                                                                                     |
|                    | (30) Citrate                         | 2.55 (d) 2.70 (d)                                                                                     |
|                    | (26) Formate                         | 8.44 (s)                                                                                              |
|                    | (31) Fumarate                        | 6.53 (s)                                                                                              |
|                    | (32) $\gamma$ -Aminobutyrate         | 1.89 (m) 2.29 (t) 3.00 (t)                                                                            |
|                    | (3) Lactate                          | 1.32 (d) 4.10 (m)                                                                                     |
|                    | (33) Malate                          | 2.40 (m) 2.68 (m) 4.30 (d)                                                                            |
|                    | (10) Pyruvate                        | 2.36 (s)                                                                                              |
|                    | (12) Succinate                       | 2.41 (s)                                                                                              |
|                    | (18) Tartrate                        | 4.32 (s)                                                                                              |
|                    | (28) Trigonelline                    | 4.42 (s) 8.06 (t) 8.81 (d) 8.83 (d) 8.84 (d) 9.11 (s)                                                 |
| Phenolic compounds | (25) Chlorogenate                    | 2.01 (t) 2.03 (t) 3.88 (m) 4.26 (d) 6.94 (d) 7.18 (d)                                                 |
|                    | (20) Epicatechin                     | 2.76 (d) 2.93 (m) 4.35 (s) 5.00 (s) 6.95 (t) 7.04 (s)                                                 |
|                    | (23) Gallate                         | 7.03 (s)                                                                                              |
|                    | (21) <i>p</i> -Hydroxyphenyl-acetate | 3.44 (s) 6.85 (d) 7.16 (d)                                                                            |
|                    | (35) Syringate                       | 3.89 (s) 7.27 (s)                                                                                     |
| Sugars             | (19) Glucose                         | 3.24 (t) 3.40 (m) 3.45 (m) 3.48 (m) 3.53 (m) 3.70 (m) 3.71 (m)<br>3.76 (m) 3.80 (m) 3.83 (m) 3.88 (m) |
|                    | (17) Fructose                        | 3.55 (m) 3.58 (m) 3.66 (m) 3.70 (m) 3.78 (m) 3.80 (m) 3.89 (m)<br>4.00 (m) 4.11 (d)                   |

<sup>a</sup> Chemical shift values are referenced to TSP signal (0.00 ppm) at pH 6.00.

<sup>b</sup> Letters indicate singlet (s), doublet (d), triplet (t) and multiplet (m) multiplicity of <sup>1</sup>H-NMR peaks, respectively.

**Table S2.** Comparative quantification of non-volatile polar metabolites identified in Thai Shiraz wine samples using a high resolution NOESY-1D-<sup>1</sup>H-NMR spectroscopy (500 MHz). Metabolite contents are expressed as log<sub>10</sub> [peak area of respective compound in arbitrary unit]. Values are the average from three or six replicates of samples corresponding to the respective type of aging containers. Superscript letters (a-f) indicate significant difference ( $p \leq 0.05$ ) among sample means within the same row.

| Chemical Group | Metabolite Name | New oak                 |                             |                          |                            |                         |                           | Medium oak                 | Old oak                    |                           | Stainless steel         |
|----------------|-----------------|-------------------------|-----------------------------|--------------------------|----------------------------|-------------------------|---------------------------|----------------------------|----------------------------|---------------------------|-------------------------|
|                |                 | ORD-G7                  | ORD-G5                      | ORD-A18                  | OSM-A3                     | OSV-A8                  | OTS-A12                   | ORD-E6                     | OFF-FF1                    | OAB-ASS1                  | SS                      |
| Alcohol        | Ethanol         | 10.40±0.03 <sup>d</sup> | 10.36±0.00 <sup>c,d</sup>   | 10.08±0.10 <sup>a</sup>  | 10.36±0.01 <sup>c,d</sup>  | 10.11±0.04 <sup>a</sup> | 10.29±0.00 <sup>b,c</sup> | 10.37±0.07 <sup>c,d</sup>  | 10.39±0.07 <sup>d</sup>    | 10.37±0.05 <sup>c,d</sup> | 10.27±0.04 <sup>b</sup> |
|                | Glycerol        | 10.39±0.03 <sup>d</sup> | 10.35±0.00 <sup>c,d</sup>   | 10.08±0.10 <sup>a</sup>  | 10.36±0.01 <sup>c,d</sup>  | 10.11±0.04 <sup>a</sup> | 10.28±0.00 <sup>b,c</sup> | 10.37±0.07 <sup>c,d</sup>  | 10.38±0.07 <sup>d</sup>    | 10.36±0.05 <sup>c,d</sup> | 10.26±0.04 <sup>b</sup> |
|                | Mannitol        | 10.40±0.03 <sup>d</sup> | 10.35±0.00 <sup>c,d</sup>   | 10.08±0.010 <sup>a</sup> | 10.36±0.01 <sup>c,d</sup>  | 10.11±0.04 <sup>a</sup> | 10.28±0.00 <sup>b,c</sup> | 10.37±0.07 <sup>c,d</sup>  | 10.39±0.07 <sup>d</sup>    | 10.37±0.05 <sup>c,d</sup> | 10.27±0.04 <sup>b</sup> |
|                | Methanol        | 8.73±0.03 <sup>c</sup>  | 8.66±0.00 <sup>b,c</sup>    | 8.36±0.09 <sup>a</sup>   | 8.68±0.01 <sup>b,c</sup>   | 8.43±0.04 <sup>a</sup>  | 8.64±0.00 <sup>b,c</sup>  | 8.65±0.07 <sup>b,c</sup>   | 8.68±0.07 <sup>b,c</sup>   | 8.61±0.05 <sup>b</sup>    | 8.60±0.04 <sup>b</sup>  |
|                | Myo-Inositol    | 10.42±0.03 <sup>d</sup> | 10.37±0.00 <sup>c,d</sup>   | 10.09±0.10 <sup>a</sup>  | 10.38±0.01 <sup>c,d</sup>  | 10.13±0.04 <sup>a</sup> | 10.30±0.00 <sup>b,c</sup> | 10.39±0.07 <sup>c,d</sup>  | 10.40±0.07 <sup>d</sup>    | 10.38±0.05 <sup>c,d</sup> | 10.28±0.04 <sup>b</sup> |
| Amino acid     | Alanine         | 10.41±0.03 <sup>d</sup> | 10.37±0.00 <sup>c,d</sup>   | 10.09±0.10 <sup>a</sup>  | 10.38±0.01 <sup>c,d</sup>  | 10.13±0.04 <sup>a</sup> | 10.30±0.00 <sup>b,c</sup> | 10.38±0.07 <sup>c,d</sup>  | 10.40±0.07 <sup>d</sup>    | 10.38±0.05 <sup>c,d</sup> | 10.28±0.04 <sup>b</sup> |
|                | Arginine        | 10.33±0.04 <sup>d</sup> | 10.29±0.00 <sup>c,d</sup>   | 10.01±0.10 <sup>a</sup>  | 10.30±0.01 <sup>c,d</sup>  | 10.04±0.05 <sup>a</sup> | 10.22±0.00 <sup>b,c</sup> | 10.30±0.06 <sup>c,d</sup>  | 10.32±0.07 <sup>d</sup>    | 10.29±0.05 <sup>c,d</sup> | 10.20±0.04 <sup>b</sup> |
|                | Glutamate       | 10.33±0.04 <sup>d</sup> | 10.29±0.00 <sup>c,d</sup>   | 10.01±0.10 <sup>a</sup>  | 10.30±0.01 <sup>c,d</sup>  | 10.04±0.05 <sup>a</sup> | 10.22±0.00 <sup>b,c</sup> | 10.30±0.06 <sup>c,d</sup>  | 10.32±0.07 <sup>d</sup>    | 10.29±0.05 <sup>c,d</sup> | 10.20±0.04 <sup>b</sup> |
|                | Histidine       | 9.20±0.03 <sup>d</sup>  | 9.14±0.00 <sup>b,c,d</sup>  | 8.83±0.09 <sup>a,c</sup> | 9.15±0.01 <sup>c,d</sup>   | 8.89±0.04 <sup>a</sup>  | 9.10±0.00 <sup>b</sup>    | 9.13±0.07 <sup>b,c,d</sup> | 9.14±0.08 <sup>b,c,d</sup> | 9.10±0.05 <sup>b,c</sup>  | 9.05±0.04 <sup>b</sup>  |
|                | Leucine         | 10.40±0.03 <sup>d</sup> | 10.36±0.00 <sup>c,d</sup>   | 10.08±0.10 <sup>a</sup>  | 10.36±0.01 <sup>c,d</sup>  | 10.11±0.05 <sup>a</sup> | 10.28±0.00 <sup>b,c</sup> | 10.37±0.07 <sup>c,d</sup>  | 10.39±0.07 <sup>d</sup>    | 10.37±0.05 <sup>c,d</sup> | 10.27±0.04 <sup>b</sup> |
|                | Methionine      | 9.22±0.04 <sup>c</sup>  | 9.11±0.00 <sup>b</sup>      | 8.84±0.09 <sup>a</sup>   | 9.17±0.01 <sup>b,c</sup>   | 8.91±0.04 <sup>a</sup>  | 9.11±0.00 <sup>b</sup>    | 9.15±0.07 <sup>b,c</sup>   | 9.18±0.07 <sup>b,c</sup>   | 9.10±0.05 <sup>b</sup>    | 9.09±0.04 <sup>b</sup>  |
|                | Phenylalanine   | 9.11±0.04 <sup>d</sup>  | 9.00±0.00 <sup>b,c</sup>    | 8.73±0.09 <sup>a</sup>   | 9.05±0.01 <sup>d</sup>     | 8.80±0.04 <sup>a</sup>  | 9.00±0.00 <sup>b,c</sup>  | 9.02±0.07 <sup>b,c</sup>   | 9.03±0.07 <sup>b,c,d</sup> | 8.98±0.05 <sup>b,c</sup>  | 8.95±0.04 <sup>b</sup>  |
|                | Proline         | 10.43±0.03 <sup>d</sup> | 10.39±0.00 <sup>c,d</sup>   | 10.11±0.10 <sup>a</sup>  | 10.40±0.01 <sup>c,d</sup>  | 10.14±0.04 <sup>a</sup> | 10.32±0.00 <sup>b,c</sup> | 10.40±0.07 <sup>c,d</sup>  | 10.42±0.07 <sup>d</sup>    | 10.40±0.05 <sup>c,d</sup> | 10.30±0.04 <sup>b</sup> |
|                | Threonine       | 10.75±0.03 <sup>d</sup> | 10.71±0.00 <sup>c,d</sup>   | 10.43±0.10 <sup>a</sup>  | 10.72±0.10 <sup>c,d</sup>  | 10.47±0.04 <sup>a</sup> | 10.64±0.00 <sup>b,c</sup> | 10.72±0.07 <sup>c,d</sup>  | 10.75±0.07 <sup>d</sup>    | 10.73±0.05 <sup>d</sup>   | 10.62±0.04 <sup>b</sup> |
|                | Tyrosine        | 9.05±0.04 <sup>d</sup>  | 8.95±0.04 <sup>b,c</sup>    | 8.67±0.00 <sup>a</sup>   | 9.01±0.01 <sup>c,d</sup>   | 8.75±0.04 <sup>a</sup>  | 8.95±0.00 <sup>b,c</sup>  | 8.98±0.07 <sup>b,c,d</sup> | 8.96±0.08 <sup>b,c,d</sup> | 8.92±0.05 <sup>b,c</sup>  | 8.89±0.04 <sup>b</sup>  |
|                | Valine          | 10.82±0.03 <sup>d</sup> | 10.78±0.00 <sup>c,d</sup>   | 10.50±0.10 <sup>a</sup>  | 10.79±0.01 <sup>c,d</sup>  | 10.53±0.04 <sup>a</sup> | 10.71±0.00 <sup>b,c</sup> | 10.79±0.07 <sup>c,d</sup>  | 10.81±0.07 <sup>d</sup>    | 10.73±0.05 <sup>c,d</sup> | 10.69±0.04 <sup>b</sup> |
| Organic acid   | Acetate         | 8.76±0.04 <sup>d</sup>  | 8.60±0.00 <sup>b,c</sup>    | 8.37±0.08 <sup>a</sup>   | 8.60±0.01 <sup>b,c</sup>   | 8.35±0.03 <sup>a</sup>  | 8.60±0.00 <sup>b,c</sup>  | 8.66±0.07 <sup>b,c</sup>   | 8.67±0.07 <sup>c</sup>     | 8.59±0.05 <sup>b,c</sup>  | 8.57±0.04 <sup>b</sup>  |
|                | Acetoacetate    | 10.34±0.04 <sup>d</sup> | 10.30±0.00 <sup>b,c,d</sup> | 10.02±0.10 <sup>a</sup>  | 10.31±0.01 <sup>c,d</sup>  | 10.05±0.05 <sup>a</sup> | 10.23±0.00 <sup>b,c</sup> | 10.32±0.07 <sup>c,d</sup>  | 10.34±0.08 <sup>d</sup>    | 10.32±0.05 <sup>c,d</sup> | 10.22±0.04 <sup>b</sup> |
|                | Acetoin         | 8.62±0.04 <sup>e</sup>  | 8.49±0.00 <sup>c,d</sup>    | 8.11±0.05 <sup>a</sup>   | 8.49±0.00 <sup>c,d</sup>   | 8.31±0.04 <sup>b</sup>  | 8.50±0.00 <sup>c,d</sup>  | 8.44±0.07 <sup>c</sup>     | 8.56±0.07 <sup>d,e</sup>   | 8.56±0.05 <sup>d,e</sup>  | 8.46±0.05 <sup>c</sup>  |
|                | Choline         | 8.85±0.04 <sup>c</sup>  | 8.74±0.00 <sup>b</sup>      | 8.46±0.08 <sup>a</sup>   | 8.74±0.09 <sup>b</sup>     | 8.53±0.04 <sup>a</sup>  | 8.74±0.00 <sup>b</sup>    | 8.76±0.07 <sup>b</sup>     | 8.77±0.07 <sup>b,c</sup>   | 8.72±0.05 <sup>b</sup>    | 8.68±0.04 <sup>b</sup>  |
|                | Citrate         | 8.46±0.04 <sup>e</sup>  | 8.39±0.00 <sup>c,d,e</sup>  | 8.05±0.07 <sup>a</sup>   | 8.40±0.01 <sup>c,d,e</sup> | 8.15±0.03 <sup>b</sup>  | 8.33±0.00 <sup>c,d</sup>  | 8.42±0.08 <sup>d,e</sup>   | 8.40±0.07 <sup>c,d,e</sup> | 8.46±0.05 <sup>e</sup>    | 8.32±0.05 <sup>c</sup>  |

| Chemical Group     | Metabolite Name                 | New oak                 |                            |                          |                            |                         |                            | Medium oak                 | Old oak                    |                            | Stainless steel          |
|--------------------|---------------------------------|-------------------------|----------------------------|--------------------------|----------------------------|-------------------------|----------------------------|----------------------------|----------------------------|----------------------------|--------------------------|
|                    |                                 | ORD-G7                  | ORD-G5                     | ORD-A18                  | OSM-A3                     | OSV-A8                  | OTS-A12                    | ORD-E6                     | OFF-FF1                    | OAB-ASS1                   | SS                       |
|                    | Formate                         | 6.43±0.05 <sup>e</sup>  | 6.15±0.00 <sup>b</sup>     | 5.91±0.15 <sup>a</sup>   | 6.12±0.02 <sup>b</sup>     | 5.87±0.07 <sup>a</sup>  | 6.19±0.03 <sup>b,c</sup>   | 6.19±0.06 <sup>b,c</sup>   | 6.12±0.07 <sup>b</sup>     | 6.27±0.06 <sup>c</sup>     | 5.91±0.04 <sup>a</sup>   |
|                    | Fumarate                        | 7.16±0.07 <sup>e</sup>  | 6.98±0.00 <sup>b,c</sup>   | 6.88±0.13 <sup>a,b</sup> | 7.05±0.00 <sup>c,d</sup>   | 6.79±0.04 <sup>a</sup>  | 6.93±0.05 <sup>b</sup>     | 7.15±0.07 <sup>d,e</sup>   | 6.97±0.08 <sup>b,c</sup>   | 6.80±0.03 <sup>a</sup>     | 6.92±0.04 <sup>b</sup>   |
|                    | γ-Aminobutyrate                 | 8.83±0.04 <sup>d</sup>  | 8.67±0.00 <sup>b,c</sup>   | 8.39±0.07 <sup>a</sup>   | 8.67±0.01 <sup>b,c</sup>   | 8.43±0.03 <sup>a</sup>  | 8.66±0.00 <sup>b,c</sup>   | 8.71±0.08 <sup>b,c</sup>   | 8.75±0.08 <sup>c,d</sup>   | 8.67±0.05 <sup>b,c</sup>   | 8.64±0.05 <sup>b,c</sup> |
|                    | Lactate                         | 10.77±0.03 <sup>d</sup> | 10.73±0.00 <sup>c,d</sup>  | 10.45±0.10 <sup>a</sup>  | 10.74±0.01 <sup>c,d</sup>  | 10.49±0.04 <sup>a</sup> | 10.66±0.00 <sup>b,c</sup>  | 10.74±0.07 <sup>c,d</sup>  | 10.76±0.07 <sup>d</sup>    | 10.75±0.05 <sup>c,d</sup>  | 10.64±0.04 <sup>b</sup>  |
|                    | Malate                          | 9.16±0.04 <sup>e</sup>  | 9.04±0.00 <sup>c,d</sup>   | 8.73±0.07 <sup>a</sup>   | 9.09±0.01 <sup>d,e</sup>   | 8.84±0.04 <sup>b</sup>  | 9.03±0.07 <sup>c,d</sup>   | 9.04±0.07 <sup>c,d</sup>   | 9.10±0.07 <sup>d,e</sup>   | 9.09±0.05 <sup>c,d,e</sup> | 9.00±0.04 <sup>c</sup>   |
|                    | Pyruvate                        | 8.60±0.04 <sup>d</sup>  | 80.52±0.00 <sup>c,d</sup>  | 8.16±0.07 <sup>a</sup>   | 8.52±0.01 <sup>c,d</sup>   | 8.26±0.03 <sup>b</sup>  | 8.47±0.00 <sup>c</sup>     | 8.51±0.08 <sup>c,d</sup>   | 8.55±0.07 <sup>c,d</sup>   | 8.52±0.05 <sup>c,d</sup>   | 8.47±0.05 <sup>c</sup>   |
|                    | Succinate                       | 8.58±0.04 <sup>d</sup>  | 8.51±0.00 <sup>c,d</sup>   | 8.16±0.07 <sup>a</sup>   | 8.51±0.01 <sup>c,d</sup>   | 8.26±0.03 <sup>b</sup>  | 8.45±0.00 <sup>c</sup>     | 8.51±0.08 <sup>c,d</sup>   | 8.53±0.07 <sup>c,d</sup>   | 8.52±0.05 <sup>c,d</sup>   | 8.45±0.05 <sup>c</sup>   |
|                    | Tartrate                        | 8.52±0.04 <sup>f</sup>  | 8.39±0.05 <sup>c,d,e</sup> | 7.07±0.07 <sup>a</sup>   | 8.39±0.00 <sup>c,d,e</sup> | 8.21±0.04 <sup>b</sup>  | 8.39±0.00 <sup>c,d,e</sup> | 8.38±0.07 <sup>c,d</sup>   | 8.46±0.07 <sup>d,e,f</sup> | 8.46±0.07 <sup>e,f</sup>   | 8.48±0.05 <sup>c</sup>   |
| Phenolic compounds | Trigonelline                    | 8.48±0.04 <sup>e</sup>  | 8.37±0.00 <sup>c,d</sup>   | 8.02±0.06 <sup>a</sup>   | 8.45±0.02 <sup>d,e</sup>   | 8.20±0.04 <sup>b</sup>  | 8.37±0.00 <sup>c,d</sup>   | 8.32±0.08 <sup>c</sup>     | 8.43±0.07 <sup>d,e</sup>   | 8.45±0.05 <sup>d,e</sup>   | 8.33±0.05 <sup>c</sup>   |
|                    | Chlorogenate                    | 10.43±0.04 <sup>d</sup> | 10.38±0.00 <sup>c,d</sup>  | 10.10±0.01 <sup>a</sup>  | 10.10±0.10 <sup>c,d</sup>  | 10.14±0.04 <sup>a</sup> | 10.31±0.00 <sup>b,c</sup>  | 10.39±0.07 <sup>c,d</sup>  | 10.41±0.07 <sup>c,d</sup>  | 10.39±0.05 <sup>c,d</sup>  | 10.29±0.04 <sup>b</sup>  |
|                    | Epicatechin                     | 8.98±0.05 <sup>b</sup>  | 8.93±0.00 <sup>b</sup>     | 8.70±0.11 <sup>a</sup>   | 8.88±0.00 <sup>b</sup>     | 8.70±0.06 <sup>a</sup>  | 8.86±0.02 <sup>b</sup>     | 8.84±0.17 <sup>a,b</sup>   | 8.95±0.07 <sup>b</sup>     | 8.89±0.05 <sup>b</sup>     | 8.86±0.03 <sup>b</sup>   |
|                    | Gallate                         | 7.60±0.05 <sup>c</sup>  | 7.50±0.00 <sup>b</sup>     | 7.25±0.11 <sup>a</sup>   | 7.50±0.00 <sup>b</sup>     | 7.31±0.04 <sup>a</sup>  | 7.50±0.00 <sup>b</sup>     | 7.61±0.07 <sup>c</sup>     | 7.50±0.07 <sup>b</sup>     | 7.45±0.05 <sup>b</sup>     | 7.42±0.04 <sup>b</sup>   |
|                    | <i>p</i> -Hydroxyphenyl acetate | 8.89±0.03 <sup>d</sup>  | 8.83±0.00 <sup>b,c,d</sup> | 8.54±0.09 <sup>a</sup>   | 8.85±0.01 <sup>c,d</sup>   | 8.59±0.04 <sup>a</sup>  | 8.79±0.00 <sup>b,c</sup>   | 8.84±0.07 <sup>b,c,d</sup> | 8.83±0.08 <sup>b,c,d</sup> | 8.81±0.05 <sup>b,c,d</sup> | 8.75±0.04 <sup>b</sup>   |
| Sugar              | Syringate                       | 9.10±0.04 <sup>d</sup>  | 9.05±0.00 <sup>b,c,d</sup> | 8.76±0.10 <sup>a</sup>   | 9.06±0.01 <sup>c,d</sup>   | 8.81±0.04 <sup>a</sup>  | 8.99±0.00 <sup>b,c</sup>   | 9.05±0.07 <sup>c,d</sup>   | 9.04±0.07 <sup>b,c,d</sup> | 9.00±0.05 <sup>b,c</sup>   | 8.96±0.04 <sup>b</sup>   |
|                    | Glucose                         | 10.41±0.03 <sup>d</sup> | 10.36±0.00 <sup>c,d</sup>  | 10.09±0.10 <sup>a</sup>  | 10.37±0.01 <sup>c,d</sup>  | 10.12±0.04 <sup>a</sup> | 10.29±0.00 <sup>b,c</sup>  | 10.38±0.07 <sup>c,d</sup>  | 10.39±0.07 <sup>d</sup>    | 10.37±0.05 <sup>c,d</sup>  | 10.27±0.04 <sup>b</sup>  |
|                    | Fructose                        | 10.41±0.03 <sup>d</sup> | 10.37±0.00 <sup>c,d</sup>  | 10.09±0.10 <sup>a</sup>  | 10.37±0.01 <sup>c,d</sup>  | 10.12±0.04 <sup>a</sup> | 10.29±0.00 <sup>b,c</sup>  | 10.38±0.07 <sup>c,d</sup>  | 10.40±0.07 <sup>d</sup>    | 10.37±0.05 <sup>c,d</sup>  | 10.28±0.04 <sup>b</sup>  |
